# Supplementary material for: Oropharyngeal microbiome dysbiosis in esophageal squamous cell carcinoma: taxonomic shifts, metabolic reprogramming, and geographic disparities in a high-incidence cohort
Source: PeerJ. 2025 Oct 6;13:e20009. doi: 10.7717/peerj.20009 (PMC12510252; doi:10.7717/peerj.20009)
Supplement: Supplemental Information 2 [file peerj-13-20009-s002.xlsx]

## Sheet: Experimental Group
	Sex	Age	Ethnicity	Occupation	Marital Status	Smoking	Alcohol Consumption	Hypertension	Diabetes Mellitus	Coronary Heart Disease	Family History	Tumor Location	Differentiation Grade	Histological Type	Surgery	T	N	M	Stage
A1	Male	60	Han Chinese	none	1	1	1	0	0	0	0	22-30	High to Moderate	Squamous Cell Carcinoma	1	T4	N1	M0	IIIC
A2	Female	58	Kazakh Ethnic Group	famer	1	0	0	0	0	0	0	25-30	Moderate	Squamous Cell Carcinoma	1	T3	N0	M0	IIB
A3	Male	52	Uyghur Ethnic Group	none	1	0	0	0	1	0	Cardia Cancer	30-39	Moderate	Squamous Cell Carcinoma	1	T3	N0	M0	IIA
A4	Female	55	Kazakh Ethnic Group	famer	1	0	0	1	0	1	0	27-36	Moderate	Squamous Cell Carcinoma	1	T3	N0	M0	IIIC
A5	Male	69	Uyghur Ethnic Group	Retired	1	0	0	0	0	0	Coronary Heart Disease	25	Low	Squamous Cell Carcinoma	1	T2	N0	M0	IIA
A6	Male	74	Hui	none	1	0	0	0	1	0	Malignant Tumor	25-32	High to Moderate	Squamous Cell Carcinoma	0	T4	Nx	M0	IVA
A7	Female	63	Uyghur Ethnic Group	none	1	0	0	0	0	0	0	30-34	Moderate to Low	Squamous Cell Carcinoma	0	T3	Nx	M0	IIIB
A8	Female	53	Kazakh Ethnic Group	famer	1	0	0	0	0	0	0	30-35	Moderate	Squamous Cell Carcinoma	0	T2	Nx	M0	IIIB
A9	Male	56	Han Chinese	famer	1	1	1	0	0	0	Malignant Tumor	15-20	Moderate	Squamous Cell Carcinoma	0	T2	N0	M0	II
A10	Male	44	Uyghur Ethnic Group	famer	1	0	0	0	0	0	0	24-30	Moderate	Squamous Cell Carcinoma	0	T4	N0	M0	III
A11	Female	76	Uyghur Ethnic Group	Retired	1	0	0	1	0	0	0	29-31	High	Squamous Cell Carcinoma	0	T2	Nx	M0	II
A12	Female	73	Uyghur Ethnic Group	famer	1	0	0	0	0	0	0	28	High	Squamous Cell Carcinoma	0	T4	N2	M0	III
A13	Female	64	Uyghur Ethnic Group	famer	1	0	0	0	0	0	0	18-21	Moderate to Low	Squamous Cell Carcinoma	0	T3	Nx	M0	III
A14	Female	67	Dongxiang	none	1	0	0	1	0	1	0	25-28	High	Squamous Cell Carcinoma	0	T3	N1	M0	IIIA
A15	Male	48	Uyghur Ethnic Group	staff	1	1	1	0	0	0	0	32-35	In Situ	Squamous Cell Carcinoma	1	T1a	N0	M0	I
A16	Male	54	Kazakh Ethnic Group	self-employed	1	1	0	1	0	0	1	25-28	Moderate	Squamous Cell Carcinoma	1	T3	N0	M0	IIA
A17	Female	58	Kazakh Ethnic Group	famer	1	0	0	0	0	0	1	30-35	Moderate	Squamous Cell Carcinoma	1	T2	N1	M0	IIB
A18	Male	69	Han Chinese	famer	1	0	0	1	1	1	0	40	High	Squamous Cell Carcinoma	1	T1	N0	M0	I
A19	Female	68	Uyghur Ethnic Group	famer	1	0	0	1	0	1	0	25-29	Moderate	Squamous Cell Carcinoma	0	T3	N0	M0	II
A20	Male	70	Han Chinese	Retired	1	0	0	0	0	0	0	28-35	In Situ	Squamous Cell Carcinoma	1	T1b	N0	M0	Ib
A21	Female	69	Kazakh Ethnic Group	famer	1	0	0	1	1	1	0	26-31	Moderate to Low	Squamous Cell Carcinoma	1	T2	N0	M0	IIA
A22	Female	57	Uyghur Ethnic Group	self-employed	1	0	0	0	0	0	0	20-22	Moderate	Squamous Cell Carcinoma	0	T3	N2	M0	IIIB
A23	Male	57	Han Chinese	self-employed	1	1	0	1	0	0	0	24-26	High	Squamous Cell Carcinoma	1	T2	N0	M0	IB
A24	Female	72	Han Chinese	famer	1	0	0	0	0	0	1	30-33	Moderate	Squamous Cell Carcinoma	1	T3	N0	M0	IIB
A25	Male	65	Han Chinese	Retired	1	1	1	0	0	0	1	26-28	Moderate to Low	Squamous Cell Carcinoma	1	T2	N0	M0	IIA
A26	Male	68	Kazakh Ethnic Group	Retired	1	0	0	0	0	0	0	25-35	Moderate	Squamous Cell Carcinoma	0	T3	N2	M0	III
A27	Male	48	Uyghur Ethnic Group	none	1	1	1	0	0	0	1	21-25	Low	Squamous Cell Carcinoma	1	T3	N0	M0	IIB
A28	Male	54	Kazakh Ethnic Group	famer	1	0	0	1	0	0	0	30	Moderate	Squamous Cell Carcinoma	0	T3	N2	M0	III
A29	Male	69	Uyghur Ethnic Group	Retired	1	1	0	0	0	0	0	29-31	Moderate	Squamous Cell Carcinoma	0	T3	N1	M0	IIIA
A30	Female	77	Han Chinese	none	1	0	0	1	0	0		28	Low	Squamous Cell Carcinoma	0	T3	N1-2	M0	III
1	YES	0	NONE

## Sheet: Control Group 
	sex	age	Ethnicity	Occupation	marriage	smoking	Alcohol Consumption	Hypertension	Diabetes Mellitus	Coronary Heart Disease
B1	Female	69	Russian	Retired	1	0	0	0	0	0
B2	Male	61	Kazakh	Retired	1	0	0	1	0	0
B3	Female	70	Han	Retired	1	0	0	0	0	0
B4	Female	67	Xibe	Retired	1	0	0	1	1	0
B5	Male	64	Han	Retired	1	1	0	0	0	0
B6	Female	68	Han	Retired	1	0	0	0	0	0
B7	Female	67	Uyghur	Retired	1	0	1	0	0	0
B8	Female	71	Han	Retired	1	0	0	1	0	0
B9	Female	68	Han	Retired	1	0	0	0	0	0
B10	Male	56	Han	Retired	1	0	1	0	0	0
B11	Male	58	Han	Retired	1	1	0	0	0	0
B12	Female	65	Han	Retired	1	0	0	0	1	0
B13	Female	68	Hui	Retired	1	0	0	0	0	0
B14	Male	59	Han	Retired	1	1	1	1	0	0
B15	Female	77	Han	Retired	1	0	1	0	0	0
B16	Female	52	Xibe	Retired	1	0	0	0	0	0
B17	Female	62	Han	Retired	1	0	0	0	0	0
B18	Male	57	Han	Retired	1	1	0	0	0	0
B19	Male	66	Han	Retired	1	0	1	0	0	0
B20	Female	63	Kazakh	Retired	1	0	0	0	0	0
B21	Female	70	Han	Retired	1	0	0	0	0	0
B22	Male	75	Kazakh	Retired	1	1	0	1	0	0
B23	Female	70	Han	Retired	1	0	0	0	0	0
B24	Male	65	Kazakh	Retired	1	1	1	0	0	0
B25	Male	58	Han	Retired	1	0	1	0	0	0
B26	Male	68	Uyghur	Retired	1	0	1	0	1	0
B27	Male	59	Han	Retired	1	0	1	0	0	0
B28	Male	69	Han	self-employed	1	0	1	0	0	0
B29	Male	76	Kazakh	self-employed	1	0	1	0	0	0
B30	Male	74	Han	self-employed	1	0	1	0	0	0
B31	Male	67	Kazakh	self-employed	1	0	1	0	0	0
1	YES	0	NONE
